# Supplementary material for: Xylazine Co-occurrence with Illicit Fentanyl is a Growing Threat in the Deep South: A Retrospective Study of Decedent Data
Source: Research Square preprint supplement (doi:10.21203/rs.3.rs-3777534/v1), 2023-12-22
Supplement: Supplementary file 1 [file 1e93f09114fe09d4bfd0187d.docx]

Table 1.

|  | Number (N=165) |
| --- | --- |
| Age |  |
| Mean ± SD | 42.2 ± 11.7 |
| Median, min to max | 42, 4 to 70 |
| Sex |  |
| Female | 52 (31.52%) |
| Male | 113 (68.49%) |
| Race |  |
| White | 97 (58.79%) |
| Black | 62 (37.58%) |
| Hispanic | 6 (3.64%) |
| Housing status |  |
| Housed | 133 (80.61%) |
| Unhoused | 30 (18.18%) |
| Unable to determine | 2 (1.21%) |
| Year identified |  |
| 2019 | 1 (0.61%) |
| 2020 | 2 (1.21%) |
| 2021 | 40 (24.24%) |
| 2022 | 102 (61.82%) |
| 2023 (through June) | 20 (12.12%) |
| Drug overlap (broad category) |  |
| Fentanyl | 165 (100%) |
| Stimulant | 124 (75.15%) |
| Benzodiazepine | 25 (15.15%) |
| Max: maximum; Min: Minimum; SD: Standard deviation | |
